# Supplementary material for: Association of serum cystatin C level and major adverse cardiovascular events in patients with percutaneous coronary intervention
Source: PubMed Central journal article supplement — Cardiovasc Diagn Ther. 2024 Aug 16;14(4):621–9. doi: 10.21037/cdt-23-482 (PMC11384458; doi:10.21037/cdt-23-482), 2024-08-16
Supplement: cdt-14-04-621-dss.pdf [file cdt-14-04-621-dss.pdf]

## Data Sharing Statement

|                     |                                                                                                                                                    |                                                                                                                                                                                           |
|---------------------|----------------------------------------------------------------------------------------------------------------------------------------------------|-------------------------------------------------------------------------------------------------------------------------------------------------------------------------------------------|
| <b>Article Info</b> | <a href="https://dx.doi.org/10.21037/cdt-23-482">https://dx.doi.org/10.21037/cdt-23-482</a>                                                        |                                                                                                                                                                                           |
| <b>Item</b>         | <b>Question</b>                                                                                                                                    | <b>Authors' Response<br/>(place "-" if not applicable)</b>                                                                                                                                |
| 1                   | Would you like to share data collected for your study to others?                                                                                   | NO.                                                                                                                                                                                       |
| 2                   | If not, would you like to share the reason for your decision?                                                                                      | We have to obtain approval from the research ethics committee for data sharing. Since the research ethics committee does not allow data sharing in general, it may be hard to share data. |
| 3                   | What data in particular will be shared?                                                                                                            | -                                                                                                                                                                                         |
| 4                   | Any other documents will be share? Such as study protocol, statistical analysis plan, informed consent form, clinical study report, analytic code. | -                                                                                                                                                                                         |
| 5                   | When will data availability begin?                                                                                                                 | -                                                                                                                                                                                         |
| 6                   | When will data availability end?                                                                                                                   | -                                                                                                                                                                                         |
| 7                   | To whom will you share the data?                                                                                                                   | -                                                                                                                                                                                         |
| 8                   | For what type of analysis or purpose?                                                                                                              | -                                                                                                                                                                                         |
| 9                   | How or where can the data/documents be obtained?                                                                                                   | -                                                                                                                                                                                         |
| 10                  | Any other restrictions?                                                                                                                            | -                                                                                                                                                                                         |
